# Supplementary material
Source: PubMed Central journal article supplement (PMC3754558)
Supplement: JB.00161-13_zjb999092715so1.pdf [file JB.00161-13_zjb999092715so1.pdf]

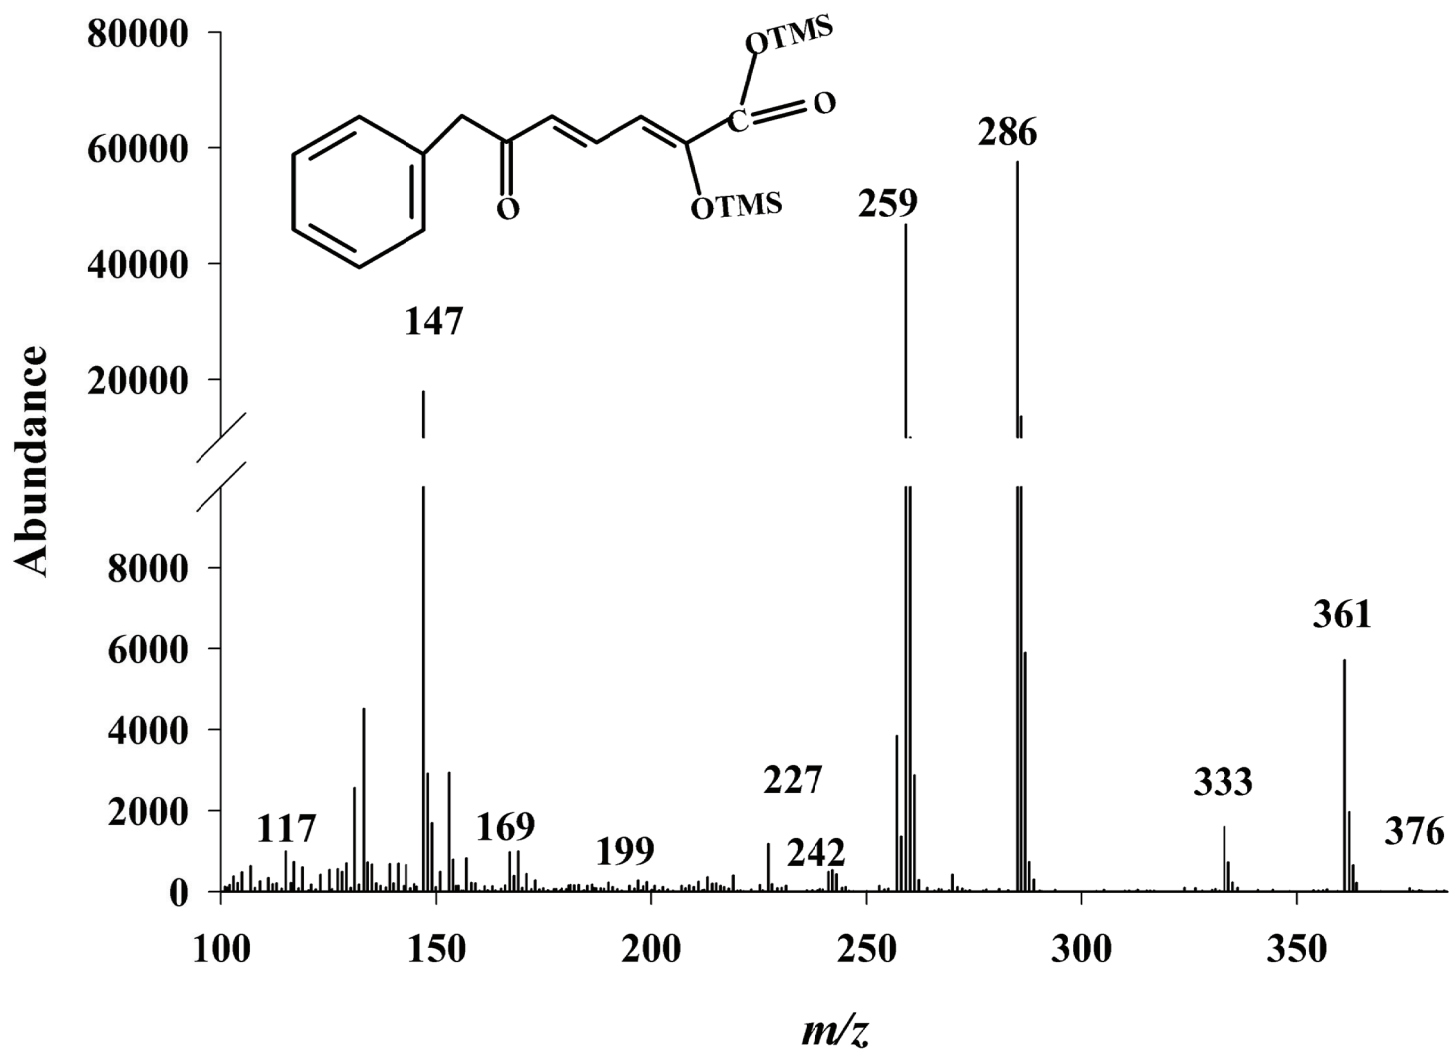

**Fig. S1** Mass spectrum of the TMS-derived acidic metabolite produced from diphenylmethane by cells of strain B356 growing on diphenylmethane. Based on spectral features, the metabolite was identified as 2-hydroxy-6-oxo-7-phenylhepta-2,4-dienoic acid.

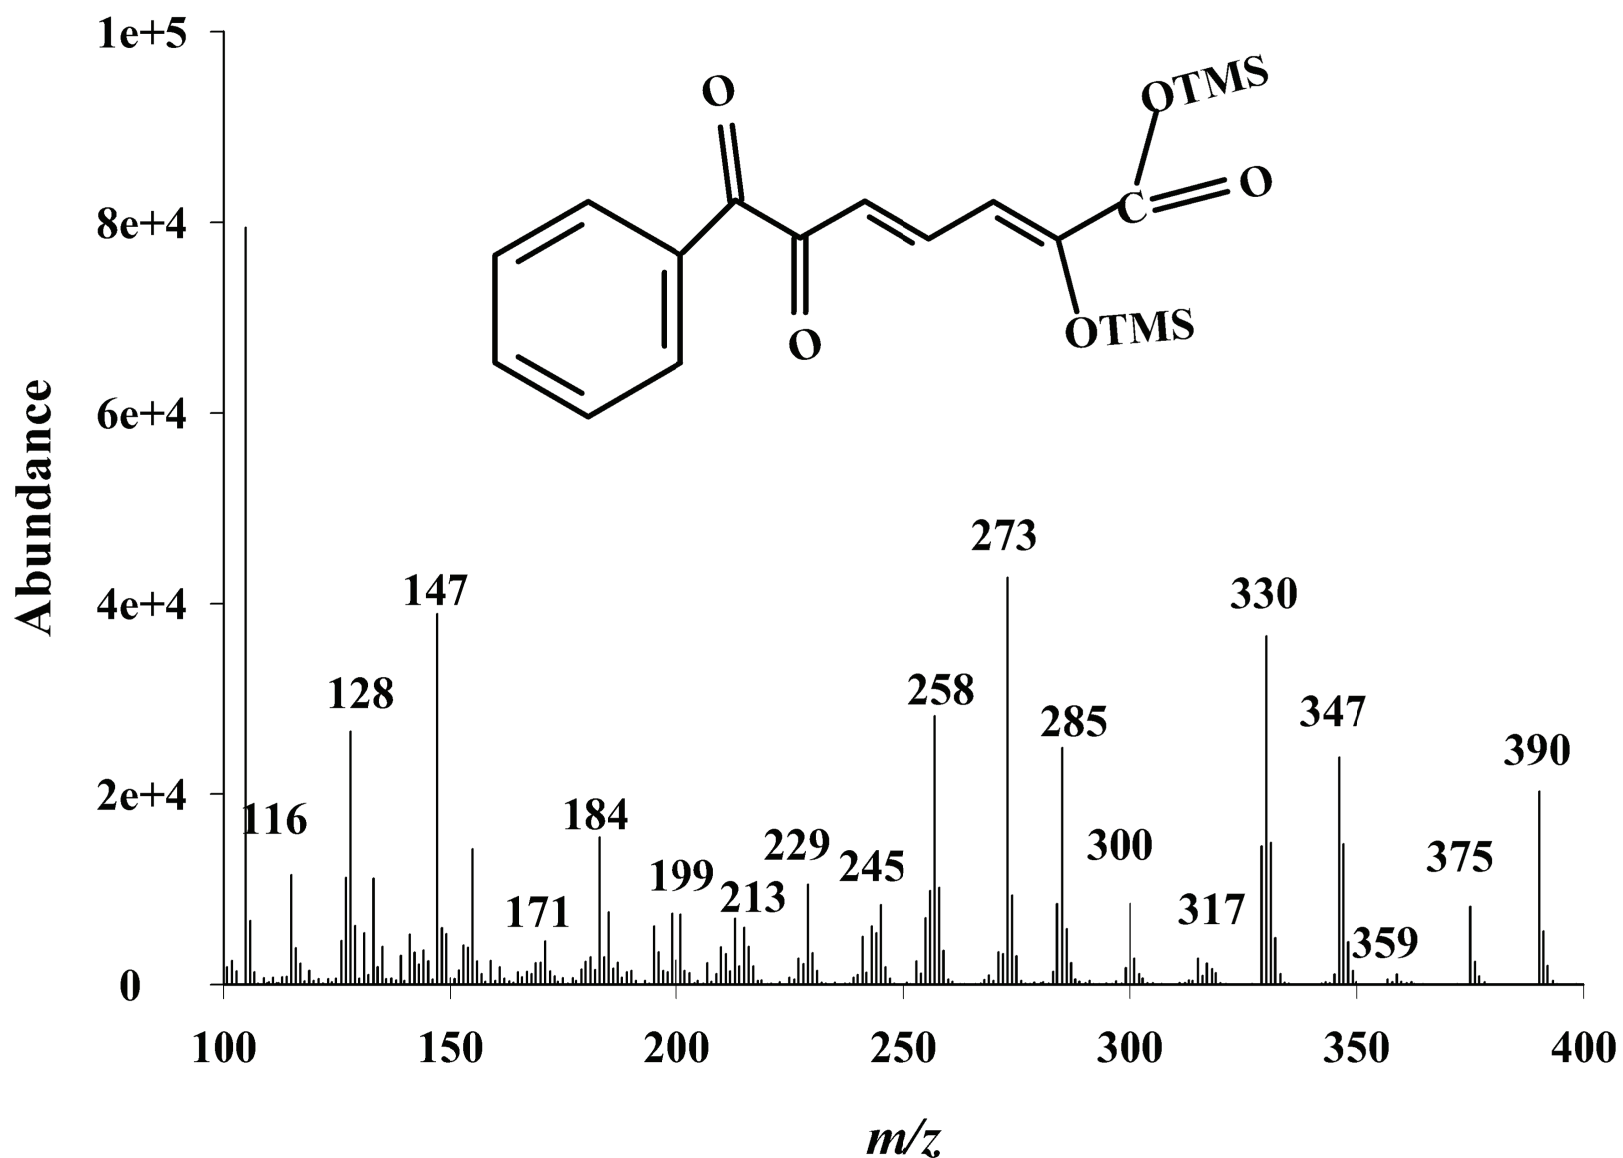

**Fig. S2** Mass spectrum of a TMS-derived acidic metabolite produced from benzophenone by biphenyl-induced cells of strain B356. Based on spectral features, the metabolite was identified as 2-hydroxy-6,7-dioxo-7-phenylheptanoic acid.

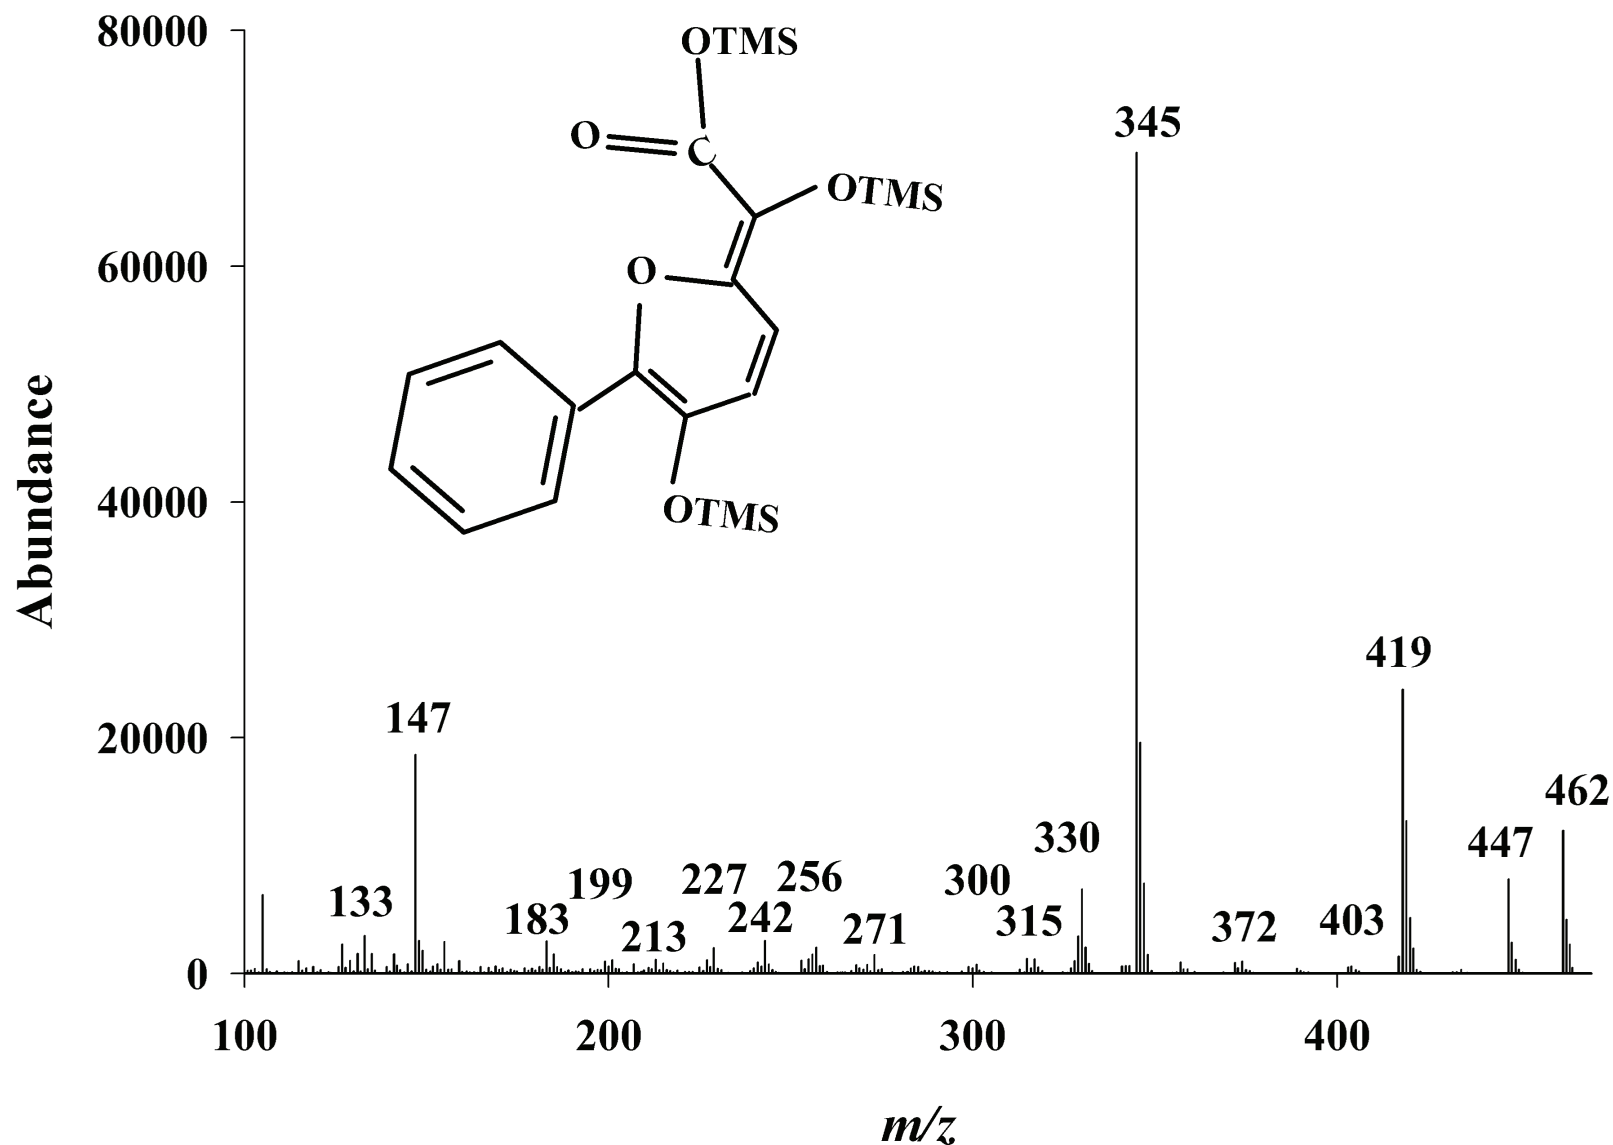

**Fig. S3** Mass spectrum of a TMS-derived acidic metabolite produced from benzophenone by biphenyl-induced cells of strain B356. Based on spectral features, the metabolite was identified as a pyranol presumably generated from a cyclization reaction of 6,7-dioxo-7-phenylheptanoic acid.

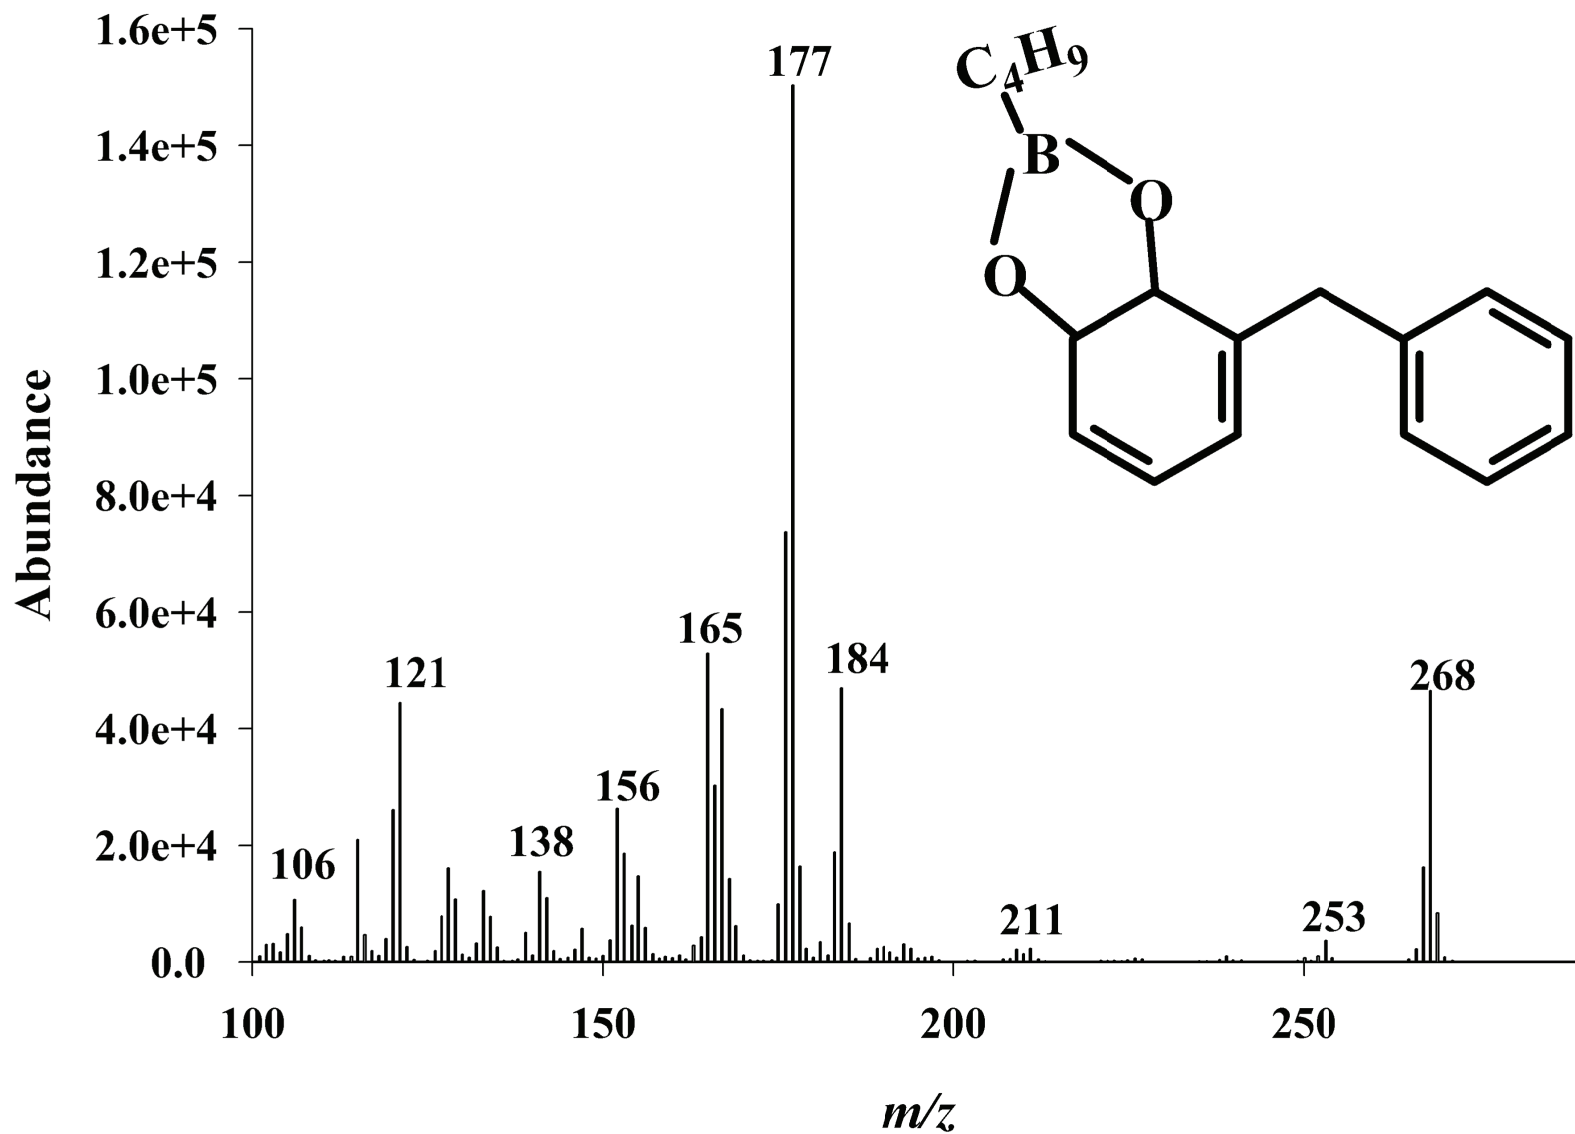

**Fig. S4** Mass spectrum of a nBuB-derived metabolite produced from diphenylmethane by BphAE<sub>B356</sub>. Based on spectral features, the metabolite was identified as 3-benzylcyclohexa-3,5-diene-1,2-diol.

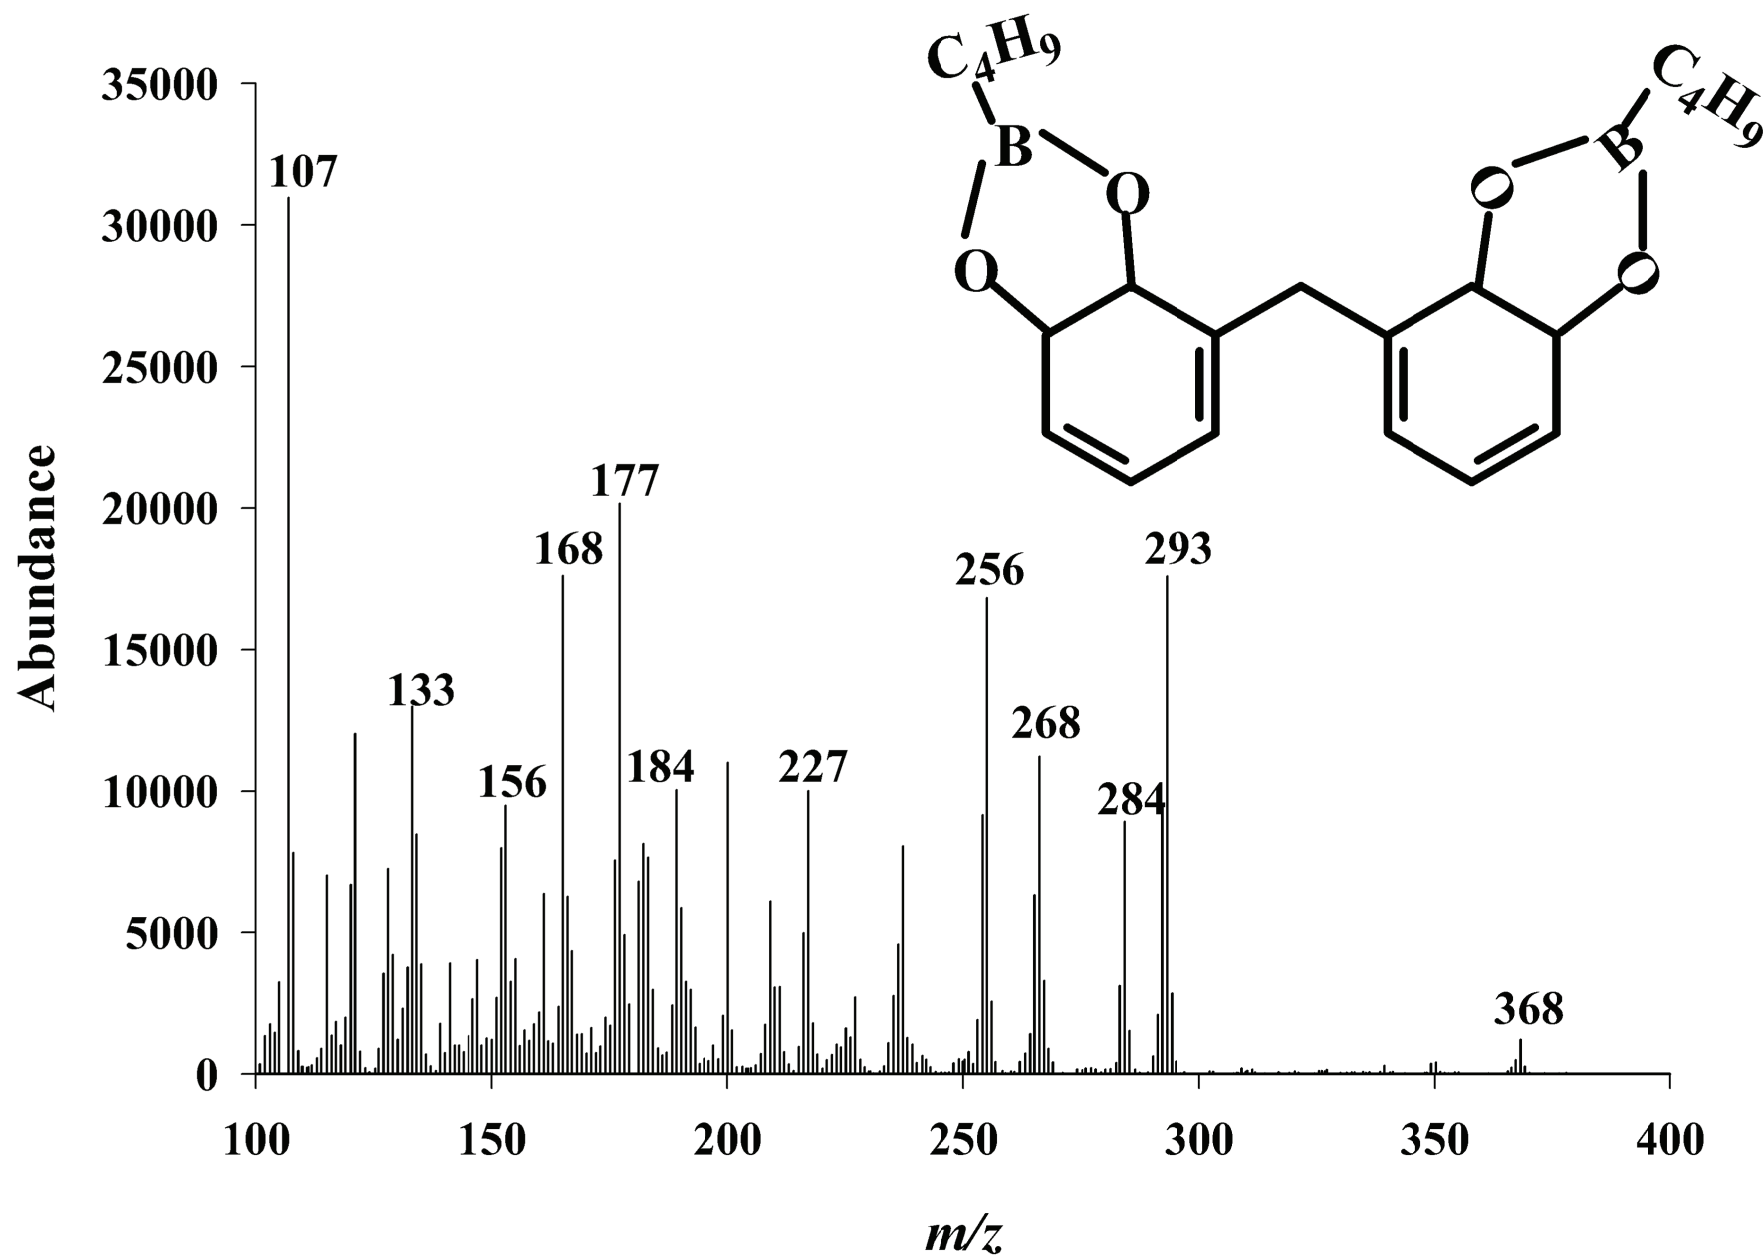

**Fig. S5** Mass spectrum of a nBuB-derived metabolite produced from diphenylmethane by BphA<sub>E<sub>B356</sub></sub>. Based on spectral features, the metabolite was identified as 3-[(5,6-dihydroxycyclohexa-1,3-dien-1-yl)methyl]cyclohexa-3,5-diene-1,2-diol.

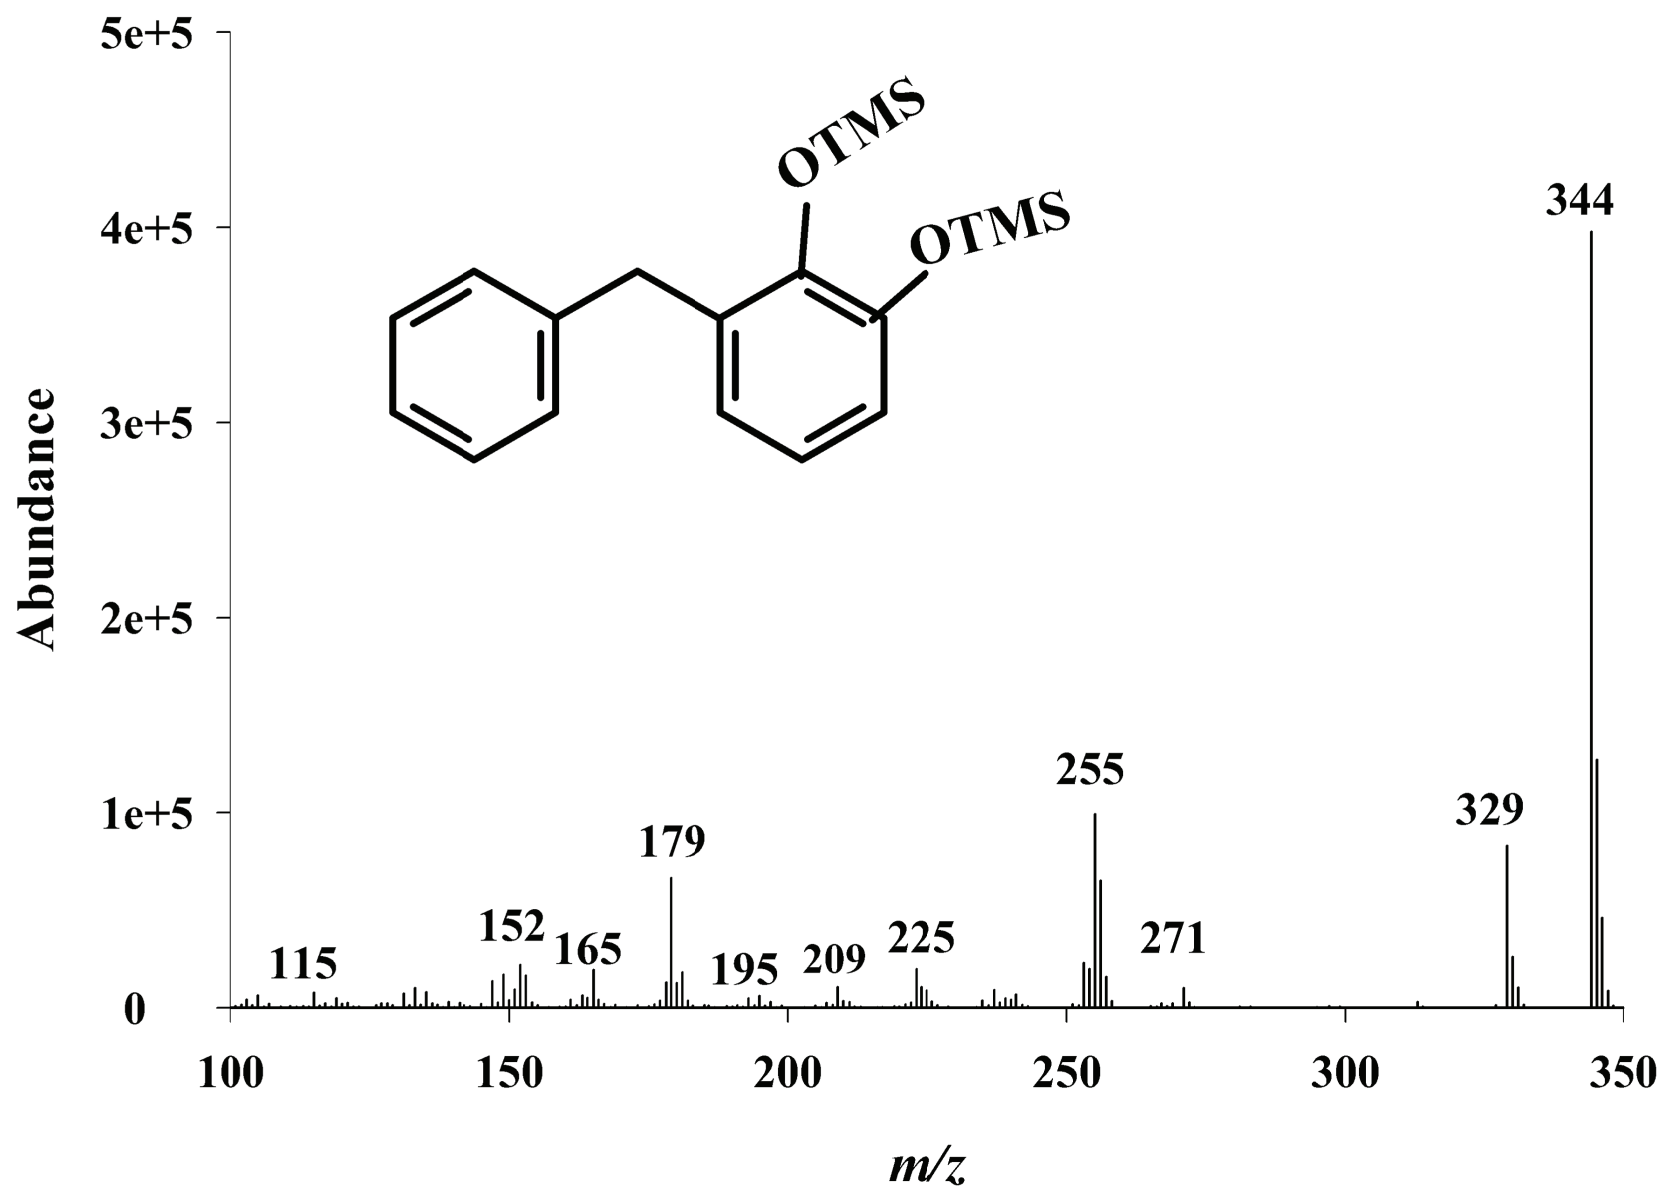

**Fig. S6** Mass spectrum of the TMS-derived major metabolite produced from diphenylmethane by a coupled reaction composed of purified preparations of BphA<sub>E<sub>B356</sub></sub> plus BphB<sub>B356</sub>. Based on spectral features, the metabolite was identified 2,3-dihydroxydiphenylmethane.

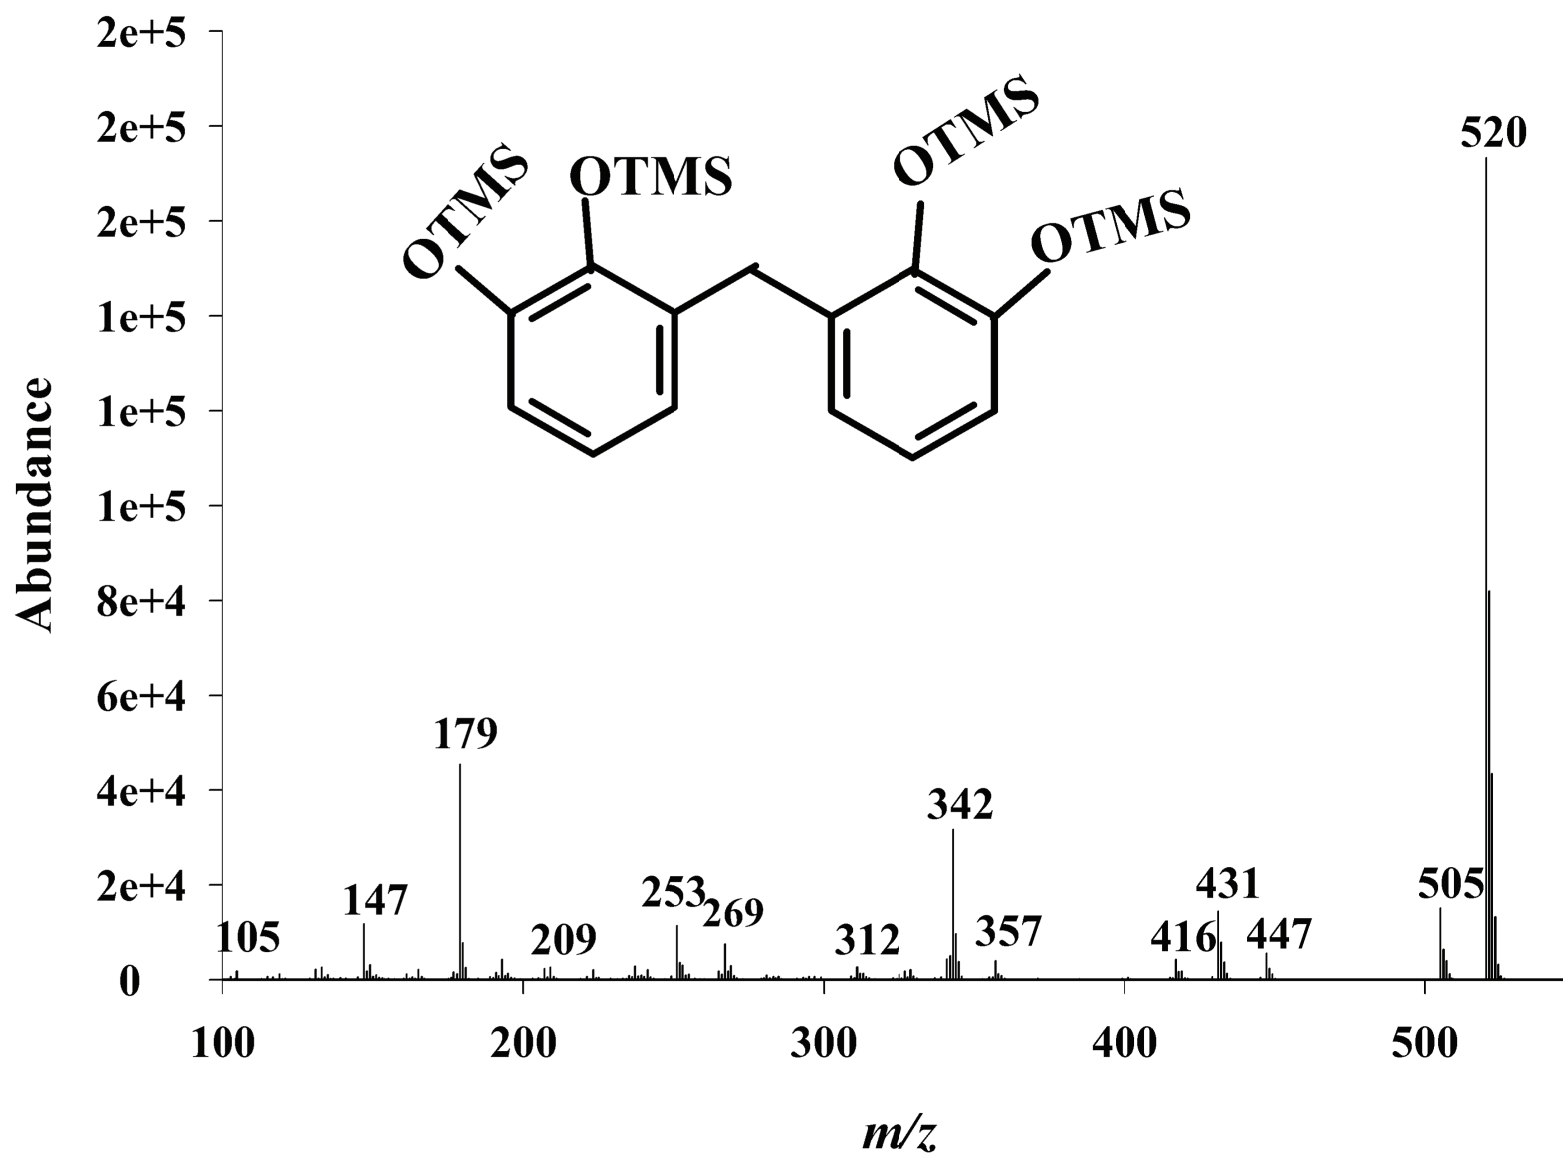

**Fig. S7** Mass spectrum of the TMS-derived minor metabolite produced from diphenylmethane by a coupled reaction composed of purified preparations of BphA<sub>E</sub>B<sub>356</sub> plus BphB<sub>B</sub>356. Based on spectral features, the metabolite was identified 2,2',3,3'-tetrahydroxydiphenylmethane.

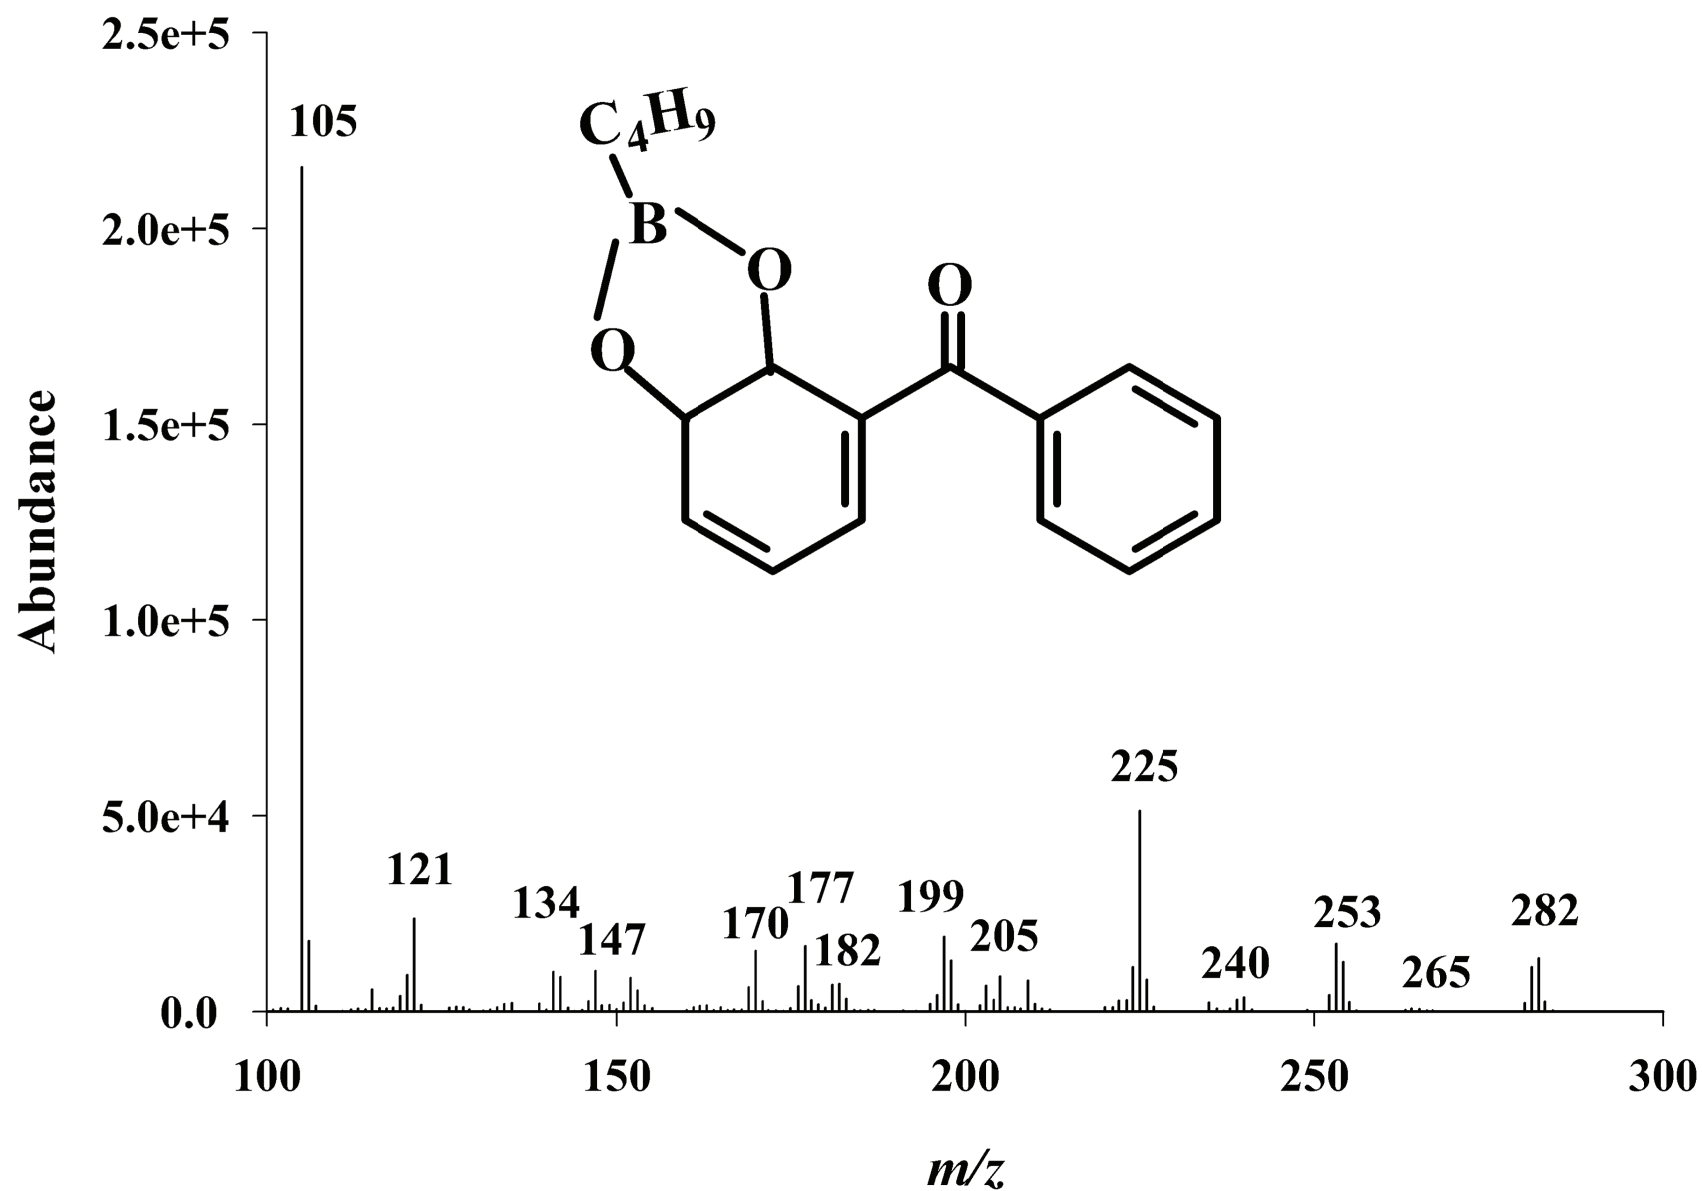

**Fig. S8** Mass spectrum of the nBuB-derived metabolite produced from benzophenone by a BphA<sub>EB356</sub>. Based on spectral features, the metabolite was identified 3-benzoylcyclohexa-3,5-diene-1,2-diol



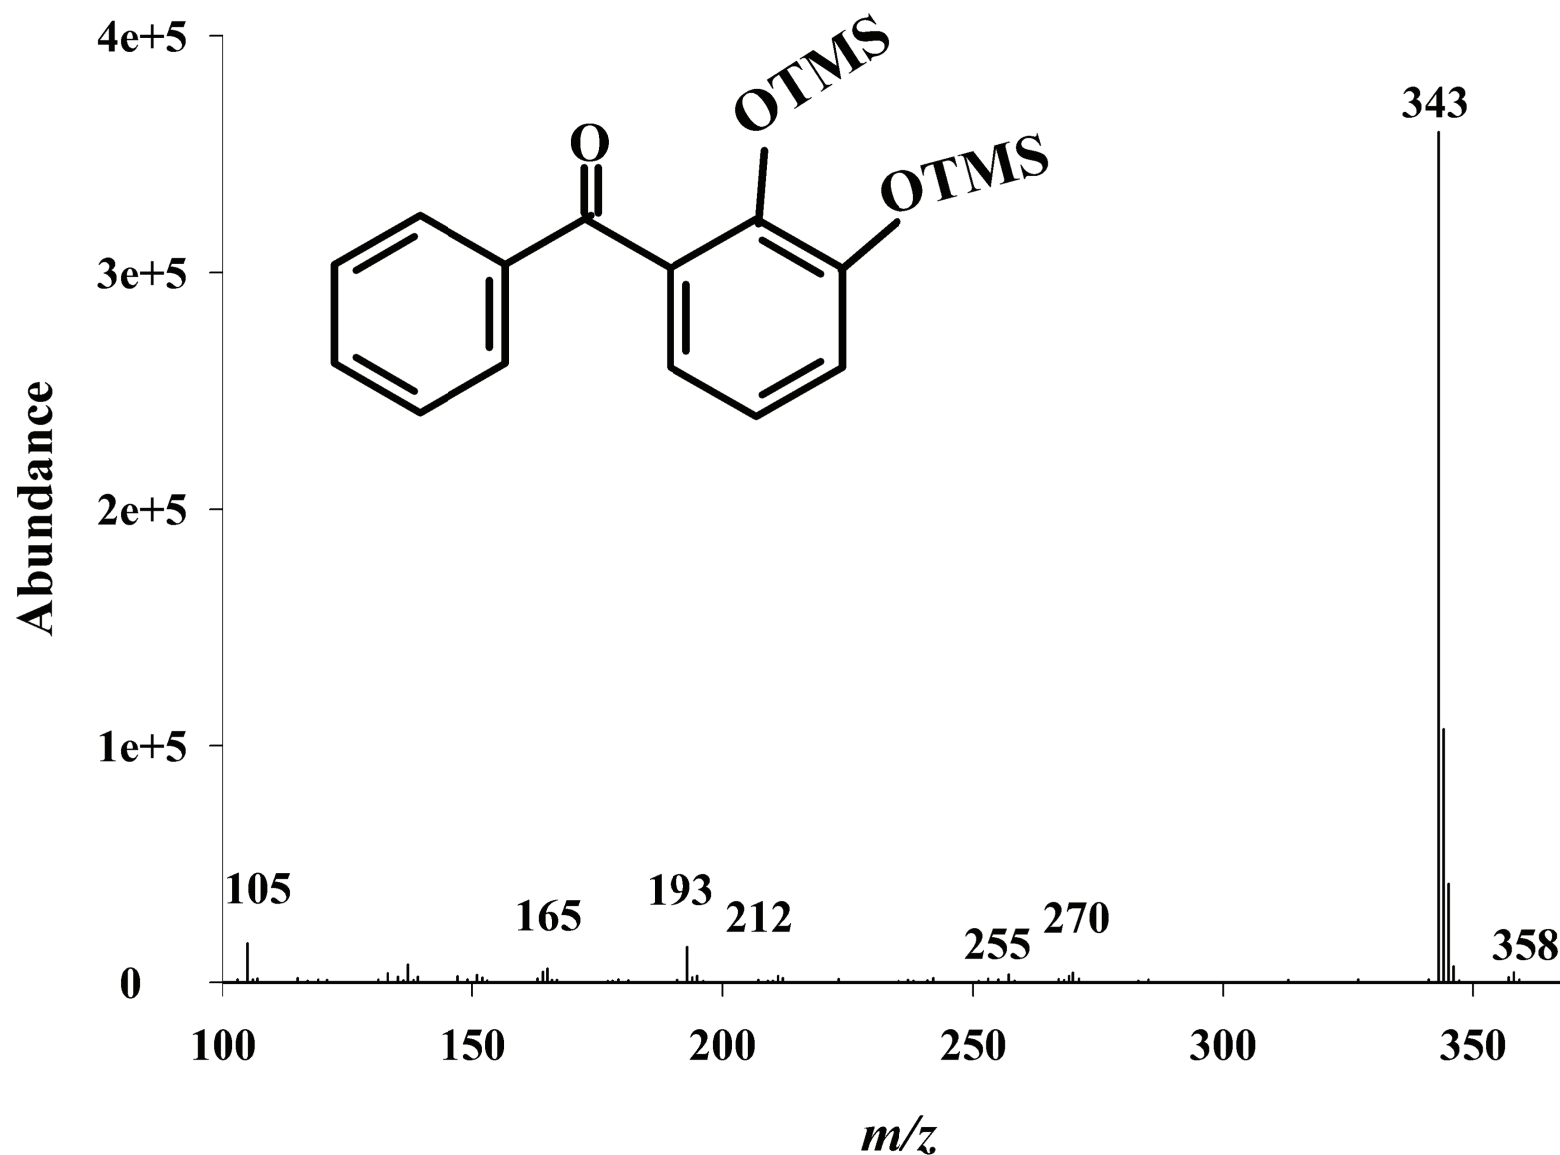

**Fig. S9** Mass spectrum of the TMS-derived metabolite produced from 3-benzoylcyclohexa-3,5-diene-1,2-diol by BphB<sub>B356</sub>. Based on spectral features, the metabolite was identified 2,3-dihydroxybenzophenone.

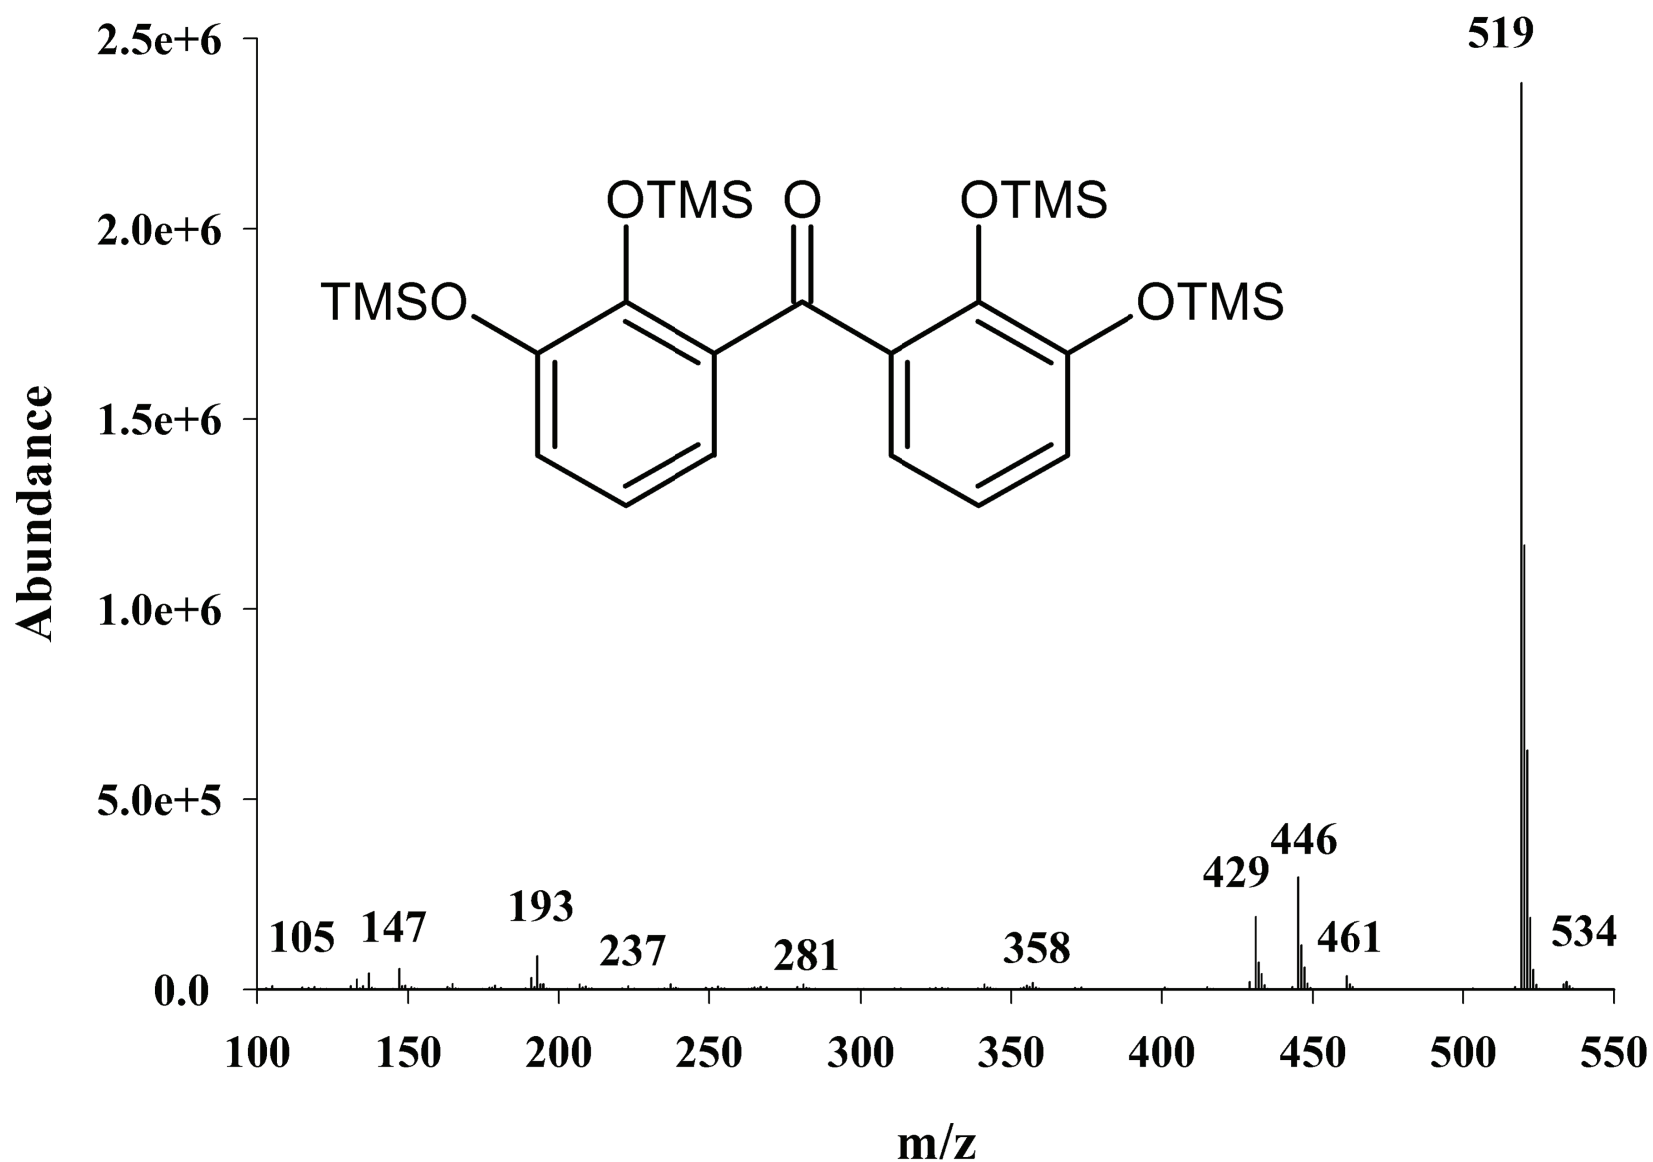

**Fig. S10** Mass spectrum of the TMS-derived major metabolite produced from benzophenone by a coupled reaction composed of BphAE<sub>B356</sub> plus BphB<sub>B356</sub>. Based on spectral features, the metabolite was identified 2,2',3,3'-tetrahydroxybenzophenone.
